# Supplementary material
Source: PubMed Central journal article supplement (PMC9475534)
Supplement: EMBJ-41-e110815-s010.pdf [file EMBJ-41-e110815-s010.pdf]

# *Ex vivo* reconstitution of fetal oocyte development in humans and cynomolgus monkeys

Ken Mizuta, Yoshitaka Katou, Baku Nakakita, Aoi Kishine, Yoshiaki Nosaka, Saki Saito, Chizuru Iwatani, Hideaki Tsuchiya, Ikuo Kawamoto, Masataka Nakaya, Tomoyuki Tsukiyama, Masahiro Nagano, Yoji Kojima, Tomonori Nakamura, Yukihiro Yabuta, Akihito Horie, Masaki Mandai, Hiroshi Ohta, and Mitinori Saitou

**DOI: 10.15252/emboj.2022110815**

*Corresponding authors: Mitinori Saitou (saitou@anat2.med.kyoto-u.ac.jp) , Hiroshi Ohta (ohta@anat2.med.kyoto-u.ac.jp)*

## Review Timeline:

|                     |             |
|---------------------|-------------|
| Submission Date:    | 31st Jan 22 |
| Editorial Decision: | 25th Mar 22 |
| Revision Received:  | 28th May 22 |
| Editorial Decision: | 24th Jun 22 |
| Revision Received:  | 28th Jun 22 |
| Accepted:           | 29th Jun 22 |

*Editor: Daniel Klimmeck*

## Transaction Report:

(Note: With the exception of the correction of typographical or spelling errors that could be a source of ambiguity, letters and reports are not edited. Depending on transfer agreements, referee reports obtained elsewhere may or may not be included in this compilation. Referee reports are anonymous unless the Referee chooses to sign their reports.)

Dear Mitinori,

Thank you for submitting your manuscript for consideration by the EMBO Journal and your patience with our response. Your manuscript has now been seen by three referees with expertise in developmental biology and single-cell analysis, whose comments are shown below.

Given the referees' overall positive recommendations, I would like to invite you to submit a revised version of the manuscript, addressing the comments of all three reviewers. Please carefully consider their input regarding complementary data analyses required and revised presentation of the results.

As you know, it is EMBO Journal policy to allow only a single round of revision, and acceptance of your manuscript will therefore depend on the completeness of your responses in this revised version.

When preparing your letter of response to the referees' comments, please bear in mind that this will form part of the Review Process File, and will therefore be available online to the community. For more details on our Transparent Editorial Process, please visit our website: <https://www.embopress.org/page/journal/14602075/authorguide#transparentprocess>

We have recently established Structured Methods as a new format for the Materials and Methods of articles published at EMBO Press. Adhering to this format is optional for research articles. However, considering the strong methodological aspect of your study, we would strongly encourage you to use it. Specifically, the Material and Methods section should include a Reagents and Tools Table (listing key reagents, experimental models, software and relevant equipment and including their sources and relevant identifiers) followed by a Methods and Protocols section in which we encourage the authors to describe their methods using a step-by-step protocol format with bullet points. More information on how to adhere to this format as well as downloadable templates (.doc or .xls) for the Reagents and Tools Table can be found in the author guidelines of our sister journal Molecular Systems Biology  
<https://www.embopress.org/page/journal/17444292/authorguide#methodguide>

An example of a paper with Structured Methods can be found here:  
<https://www.embopress.org/doi/full/10.15252/emj.2018100300>

We encourage you to be even more explicit in adding details on the experimental procedures, as this should be valuable in ensuring reproducible application if the approach.

We generally allow three months as standard revision time. As a matter of policy, competing manuscripts published during this period will not negatively impact on our assessment of the conceptual advance presented by your study. However, we request that you contact the editor as soon as possible upon publication of any related work, to discuss how to proceed. Should you foresee a problem in meeting this three-month deadline, please let us know in advance and we may be able to grant an extension.

Thank you for the opportunity to consider your work for publication. I look forward to your revision.

Kind regards,

Daniel

Daniel Klimmeck, PhD  
Senior Editor  
The EMBO Journal

Instruction for the preparation of your revised manuscript:

- 1) a .docx formatted version of the manuscript text (including legends for main figures, EV figures and tables). Please make sure that the changes are highlighted to be clearly visible.
- 2) individual production quality figure files as .eps, .tif, .jpg (one file per figure).
- 3) a .docx formatted letter INCLUDING the reviewers' reports and your detailed point-by-point response to their comments. As part of the EMBO Press transparent editorial process, the point-by-point response is part of the Review Process File (RPF), which will be published alongside your paper.

4) a complete author checklist, which you can download from our author guidelines ([https://wol-prod-cdn.literatumonline.com/pb-assets/embo-site/Author Checklist%20-%20EMBO%20J-1561436015657.xlsx](https://wol-prod-cdn.literatumonline.com/pb-assets/embo-site/Author%20Checklist%20-%20EMBO%20J-1561436015657.xlsx)). Please insert information in the checklist that is also reflected in the manuscript. The completed author checklist will also be part of the RPF.

5) Please note that all corresponding authors are required to supply an ORCID ID for their name upon submission of a revised manuscript.

6) It is mandatory to include a 'Data Availability' section after the Materials and Methods. Before submitting your revision, primary datasets produced in this study need to be deposited in an appropriate public database, and the accession numbers and database listed under 'Data Availability'. Please remember to provide a reviewer password if the datasets are not yet public (see <https://www.embopress.org/page/journal/14602075/authorguide#datadeposition>).

In case you have no data that requires deposition in a public database, please state so in this section. Note that the Data Availability Section is restricted to new primary data that are part of this study.

\*\*\* Note - All links should resolve to a page where the data can be accessed. \*\*\*

7) Our journal encourages inclusion of \*data citations in the reference list\* to directly cite datasets that were re-used and obtained from public databases. Data citations in the article text are distinct from normal bibliographical citations and should directly link to the database records from which the data can be accessed. In the main text, data citations are formatted as follows: "Data ref: Smith et al, 2001" or "Data ref: NCBI Sequence Read Archive PRJNA342805, 2017". In the Reference list, data citations must be labeled with "[DATASET]". A data reference must provide the database name, accession number/identifiers and a resolvable link to the landing page from which the data can be accessed at the end of the reference. Further instructions are available at .

8) We would also encourage you to include the source data for figure panels that show essential data. Numerical data can be provided as individual .xls or .csv files (including a tab describing the data). For 'blots' or microscopy, uncropped images should be submitted (using a zip archive or a single pdf per main figure if multiple images need to be supplied for one panel). Additional information on source data and instruction on how to label the files are available at .

9) We replaced Supplementary Information with Expanded View (EV) Figures and Tables that are collapsible/expandable online (see examples in <https://www.embopress.org/doi/10.15252/emj.201695874>). A maximum of 5 EV Figures can be typeset. EV Figures should be cited as 'Figure EV1, Figure EV2' etc. in the text and their respective legends should be included in the main text after the legends of regular figures.

- For the figures that you do NOT wish to display as Expanded View figures, they should be bundled together with their legends in a single PDF file called \*Appendix\*, which should start with a short Table of Content. Appendix figures should be referred to in the main text as: "Appendix Figure S1, Appendix Figure S2" etc. See detailed instructions regarding expanded view here: .

- Additional Tables/Datasets should be labelled and referred to as Table EV1, Dataset EV1, etc. Legends have to be provided in a separate tab in case of .xls files. Alternatively, the legend can be supplied as a separate text file (README) and zipped together with the Table/Dataset file.

10) When assembling figures, please refer to our figure preparation guideline in order to ensure proper formatting and readability in print as well as on screen:

<http://bit.ly/EMBOPressFigurePreparationGuideline>

Please remember: Digital image enhancement is acceptable practice, as long as it accurately represents the original data and conforms to community standards. If a figure has been subjected to significant electronic manipulation, this must be noted in the figure legend or in the 'Materials and Methods' section. The editors reserve the right to request original versions of figures and the original images that were used to assemble the figure.

11) For data quantification: please specify the name of the statistical test used to generate error bars and P values, the number (n) of independent experiments (specify technical or biological replicates) underlying each data point and the test used to calculate p-values in each figure legend. The figure legends should contain a basic description of n, P and the test applied. Graphs must include a description of the bars and the error bars (s.d., s.e.m.).

Further information is available in our Guide to Authors: <https://www.embopress.org/page/journal/14602075/authorguide>

We realize that it is difficult to revise to a specific deadline. In the interest of protecting the conceptual advance provided by the work, we recommend a revision within 3 months (23rd Jun 2022). Please discuss the revision progress ahead of this time with

the editor if you require more time to complete the revisions. Use the link below to submit your revision:

Link Not Available

-----  
Referee #1:

This a very through and comprehensive dynamic characterisation of foetal oocyte development. It will serve as a molecular and cellular atlas of oocyte maturation in vivo and in vitro of broad interest for the developmental biology community. The authors have done an excellent job both at the stage of setting up the experimental conditions and at the level of analysis. I support the publication of this manuscript, after the following minor comments have been addressed (no experiments are required):

1. Reconstitution of foetal oocyte development in vitro: in their experimental protocol the authors disaggregate the ovary into single cells, which are then reaggregated to form spheres. Is the disaggregation step really necessary? I imagine this step would be really useful when trying to co-culture somatic ovarian cells with human oogonia-like cells. But, is it really necessary if no exogenous cells are added? It is also not clear whether upon reaggregation the characteristic anatomical structure of the ovary (described in figure 1) is reformed. The authors just mention that the core is not very healthy. Do they see an outer cortex and an inner cortex? If not, this would mean oocyte maturation can happen in the absence of an appropriate ovarian anatomy.
2. Comparisons between in vivo and in vitro: the authors conclude that the transcriptome of the in vitro cells was indistinguishable from the transcriptome of the in vivo cells. This is not clearly shown in the manuscript. Has a differential gene expression analysis been done? Are there no genes differentially expressed between the in vitro cells and their in vivo counterparts? Figure 4J shows a cluster of unclassified cells, and some of the in vitro cells are assigned an unclassified identity. What is this cluster exactly? It is of course important to emphasise the similarities between in vivo and in vitro but the authors should also acknowledge potential differences.
3. Maturation dynamics in xenotransplantation and in vitro culture: based on the data shown in figures 4L and 4K it seems that the xenotransplantation samples do not really progress with time. While the progression is clear in the in vitro cultured samples, in the case of xenotransplantation there is a complete mix of identities in the different time points analysed. The authors note that in vitro the time required for differentiation is longer, but this does not seem to be the case based on these two panels.
4. Panel 4K: what was the criteria to select those specific genes? Could the authors plot the genes that characterise the clusters identified in panel 4H?
5. Discussion: the authors have previously shown that human primordial germ cell like cells (hPGCLCs) can be differentiated in vitro into oogonia. I think the next natural step would be to apply the protocol describe in this manuscript to attempt further maturation of the hPGCLC-derived oogonia. This is something that perhaps the authors could mention in the discussion.
6. In certain parts the paper looks like a catalog of genes. I think the text could be simplified by providing some of the information on markers genes as a supplementary table instead.

Referee #2:

Summary: In this manuscript, the authors optimized an in vitro culture condition for fetal oocyte development both in humans and monkeys, showing that mitotic oogonia enter into and complete the first meiotic prophase to form primordial follicles. They demonstrated that fetal oocyte development in both species can be faithfully reconstituted in vitro based on cytological and single-cell transcriptomic analysis. Furthermore, by comparing single-cell transcriptomes among humans, monkeys and mice, they identified evolutionary conserved and primate-specific transcriptional and cellular programs during fetal oocyte development.

The present manuscript is potentially important because it provides new insights into primate-specific transcriptional and cellular programs during fetal oocyte development. However, their main claims based on transcriptomic analysis are not well supported by data presented.

Major points:

1. Fig. EV3E: The authors should provide the proportion of the predicted cell cycle phase (G1, S, and G2/M) of cells across cell types, and check whether the cell cycle assignments are consistent with their conclusions based on marker expression and GO enrichment analysis.
2. Fig. 4G: The trajectory graph should be provided. The heatmap showing the pseudo-temporal expression patterns of HVGs should be also provided, and this should be consistent with Fig. 4H.

3. Fig. 4J-L: The main claim that cy fetal germ cells undergo appropriate transcriptomic maturation in vitro" was not well supported. The newly generated scRNA-seq data have too small number of cells to be properly analyzed. To address this issue, the in vivo scRNA-seq data in Fig. 4D should be served as a reference map to understand all the scRNA-seq data. For this, each data should be projected into the UMAP in Fig. 4D based on the transcriptomic similarity. The pseudo-temporal expression patterns of genes among data should be compared in a more systematic way.
4. Fig. EV4F: A substantial number of cells at 12/15 w-ivc were merged with cluster 4. What is the characteristics of these cells?
5. Fig. 5E-G: This human in vitro scRNA-seq data should be projected into the reference map in Fig. 4D and the pseudo-temporal expression patterns should be carefully compared.
6. Fig. 6D: This difference between humans and mice might be driven by the sampling issue. It seems that human cells were enriched in the mitotic compartment, but mouse cells were evenly distributed across cell types. The authors should carefully address this issue.
7. Fig. 6E: The authors should evaluate the robustness of their claim by using all expressed orthologous genes common to the three species.
8. Fig. 6F: The expression patterns of 83 genes showing specific expression changes in humans and monkeys should be also examined in the other mouse data to confirm the robustness of this finding (Zhao et al. and Ge et al.)
9. Fig. 7D: This analysis might be also affected by the sampling issue because each cell type has the different number of cells. I'm wondering whether the main conclusion is not affected if we fix the number of cells across cell types.

Minor points:

1. Fig. 3E: The time information was not well distinguished. It would be better to present this like Fig. 3B.
2. Fig. EV4F: The clusters should be renamed to avoid the confusion arisen from clusters in Fig. EV4A.

Referee #3:

In the manuscript entitled "Ex vivo reconstitution of fetal oocyte development in humans and monkeys", Ken Mizuta and colleagues deeply studied the female germ line development in primates using *Cynomolgus* monkey and human models. The study provides an extremely well detailed characterization of oogenesis in Cy monkeys in vivo and ex vivo by both IF and transcriptomics. With an extensive analysis of different culture medium components, cell culture coating and set-up, the authors have successfully recapitulated in vitro maturation of Cy fetal ovaries. They then adapted their protocol to human fetal ovaries with success. Transcriptomic analysis of human, monkey and mouse datasets (either produced by the authors or from public datasets) showed important evolutionary-conserved and primate-specific as well as species-specific genes involved in oogonia development.

One of the specificities of female germline development is X-chromosome reactivation (XCR) and question remains open if this is linked to excess of X-linked gene expression, with contradictory studies in humans (Sangrithi et al., 2017 and Chitiashvili et al., 2020). Based on their datasets and public ones, the authors analysed X:autosome ratio and concluded little to no X-linked gene excess despite XCR, due to erasure of X-chromosome upregulation. This is significant results for the X-chromosome regulation field. However, before formally supporting this conclusion, the authors should reanalyse the datasets from Sangrithi study with their bioinformatics pipeline. Furthermore, how to measure X:A ratios has been debated here (Kharchenko et al., 2011). It would then be important to support the manuscript conclusions with X:A ratios measurement based on these recommendations (Kharchenko et al, 2011).

Minor concerns:

- Number of analysed cells and/or number of biological replicates are often missing and should be given in figure legends (i.e. Fig2D, 3F, EV1, EV2). Number of performed xenotransplantation experiments should be stated.
- Introduction of X-chromosome regulation (and then Figure 7) should be included in the introduction section.
- Colour choices of Late pachytene and diplotene make it difficult to read, especially on printed version.

**Rebuttal: EMBOJ-2022-110815**

We would like to sincerely thank the Reviewers for their constructive comments, which we have used as the basis for revising our manuscript.

**Reviewers' Comments:****Reviewer: 1**

*This a very through and comprehensive dynamic characterisation of foetal oocyte development. It will serve as a molecular and cellular atlas of oocyte maturation in vivo and in vitro of broad interest for the developmental biology community. The authors have done an excellent job both at the stage of setting up the experimental conditions and at the level of analysis. I support the publication of this manuscript, after the following minor comments have been addressed (no experiments are required):*

**Response 1.** We sincerely thank the Reviewer for the encouraging comments.

*1. Reconstitution of foetal oocyte development in vitro: in their experimental protocol the authors disaggregate the ovary into single cells, which are then reaggregated to form spheres. Is the disaggregation step really necessary? I imagine this step would be really useful when trying to co-culture somatic ovarian cells with human oogonia-like cells. But, is it really necessary if no exogenous cells are added?*

**Response 2.** We agree with the Reviewer that an *ex vivo* reconstitution of cynomolgus monkey (cy) or human (h) fetal oocyte development itself does not require the dissociation/re-aggregation steps of fetal ovaries. As pointed out by the Reviewer, a key reason why we adopted these steps was to apply the protocol to the re-aggregation with cy/h oogonia-like cells induced from cy/h pluripotent stem cells (PSCs) in future experiments. In addition, the adoption of dissociation/re-aggregation steps has the following advantages: 1) the dissociation of fetal ovaries into single cells allows us to prepare frozen stocks with an appropriate cell number, which in turn makes systematic exploration of the culture conditions feasible; 2) the dissociation of fetal ovaries into single cells allows us to selectively isolate the required cell populations, e.g., granulosa cells, for subsequent analysis. We provided an explanation of these points in the revised manuscript (**INTRODUCTION** section, 4<sup>th</sup> paragraph).

*It is also not clear whether upon reaggregation the characteristic anatomical structure of the ovary (described in figure 1) is reformed. The authors just mention that the core is not very healthy. Do they see an outer cortex and an inner cortex? If not, this would mean oocyte maturation can happen in the absence of an appropriate ovarian anatomy.*

**Response 3.** The typical width of the cy fetal ovarian cortex *in vivo* is ~450 µm, while the cy/h reconstituted ovaries (rOvaries) we generated are ~250 µm in radius, and we did not recognize an outer/inner cortex-like structural stratification in cy/h rOvaries. On the other hand, we did observe ovarian cord-like structures in cy/h rOvaries. We provided additional histological/immunofluorescence (IF) images of cy rOvaries to

clarify this point and relevant discussion in the revised manuscript (Appendix Fig S1, “**Cy fetal oocyte development**” section, 2<sup>nd</sup> paragraph; “**Cy fetal oocyte development in xenotransplanted cy rOvaries**” section, 2<sup>nd</sup> paragraph; “**Reconstitution of cy fetal oocyte development *in vitro***” section, 2<sup>nd</sup> paragraph).

2. *Comparisons between in vivo and in vitro: the authors conclude that the transcriptome of the in vitro cells was indistinguishable from the transcriptome of the in vivo cells. This is not clearly shown in the manuscript. Has a differential gene expression analysis been done? Are there no genes differentially expressed between the in vitro cells and their in vivo counterparts?*

**Response 4.** We would like to sincerely thank the Reviewer for this comment. In response to this point, we performed a more careful comparison of the gene expression between cy fetal oocytes *in vivo* and *in vitro* using the SC3-seq data, because the SC3-seq detects larger numbers of genes and shows better quantitative performance than the 10X scRNA-seq (Nakamura, Yabuta et al., 2015) (Appendix Fig S5A and Fig EV3C in the revised manuscript). We found that the correlation coefficients between *in vivo* and *in vitro* RA-responsive/meiotic/oogenic cells in all the expressed genes were 0.968/0.968/0.982, respectively (Appendix Fig S5B in the revised manuscript). The differentially expressed genes (DEGs) (those with more than 4-fold expression differences (Nakamura et al., 2015)) between *in vivo* and *in vitro* RA-responsive/meiotic/oogenic cells were few in number, but included some key genes for oocyte development, including *ZGLP1*, *REC8* (RA-responsive), *SOHLH1*, *NOBOX* (meiotic), *NLRP4*, and *ZP4* (oogenic) (Table EV4). Examination of their expression along the pseudo-time developmental trajectory suggested that while the differential expression of *SOHLH1*, *NOBOX* (meiotic), *NLRP4*, and *ZP4* (oogenic) may result from a difference in meiotic/oogenic stages in the cell populations used for the comparison, the differential expression of *ZGLP1* and *REC8* (RA-responsive) may reflect a significant difference (Appendix Fig S5C), which could explain why the pre-leptotene to leptotene transition may be a rate-limiting step under the current culture condition (Fig 3G). Collectively, these facts lead us to conclude that *in vivo* and *in vitro* fetal oocytes are highly similar in gene expression, but the up-regulation of key genes for the pre-leptotene to leptotene transition may not be optimal under the current *in vitro* culture condition. We provided relevant data and discussion in the revised manuscript (Appendix Fig S5, Table EV4, “**Transcriptome dynamics for cy fetal ovary development *in vivo*, in xenotransplantation, and *in vitro***” section, 4<sup>th</sup> paragraph; **DISCUSSION** section, 3<sup>rd</sup> paragraph).

*Figure 4J shows a cluster of unclassified cells, and some of the in vitro cells are assigned an unclassified identity. What is this cluster exactly? It is of course important to emphasise the similarities between in vivo and in vitro but the authors should also acknowledge potential differences.*

**Response 5.** The unclassified *in vivo* cells (Fig 4D: labelled as U) showed significantly

lower levels of nUMI and nGenes (Fig EV3C), and exhibited gene-expression profiles highly correlated with those of pre-leptotene/leptotene cells (Fig 4I), and we assume that these cells were apoptotic cells at the pre-leptotene/leptotene stage, which is briefly described in the original manuscript. In good agreement with this idea, we detected germ cells with apoptotic markers (cCAS3 and cPARP) at a relatively high ratio at 10 and 12 wpf (Fig EV1F), which is the time range when mitotic germ cells initiate differentiation into pre-leptotene/leptotene cells (Fig 1G), and the dynamics of the emergence of apoptotic cells was somewhat similar to that of RA-responsive cells (pre-leptotene/leptotene cells) during fetal oocyte development (Fig 1G). We also detected germ cells with apoptotic markers in cy rOvaries *in vitro* (Fig EV2C), indicating that a fraction of germ cells also undergo apoptosis upon the progression of meiotic prophase *in vitro*. We provided these data and relevant discussion in the revised manuscript (Fig 1G, 4D and I, Fig EV1F, 2C, and 3C, “**Transcriptome dynamics for cy fetal ovary development *in vivo*, in xenotransplantation, and *in vitro***” section, 1<sup>st</sup> paragraph).

*3. Maturation dynamics in xenotransplantation and in vitro culture: based on the data shown in figures 4L and 4K it seems that the xenotransplantation samples do not really progress with time. While the progression is clear in the in vitro cultured samples, in the case of xenotransplantation there is a complete mix of identities in the different time points analysed. The authors note that in vitro the time required for differentiation is longer, but this does not seem to be the case based on these two panels.*

**Response 6.** The reason why the maturation dynamics may not be properly represented in the SC3-seq data for the xenotransplantation experiments (Fig 4K and L) was that the number of cells analyzed in this experiment was small, in part because cy fetal ovaries are a limited material, and it was somewhat technically difficult to dissociate transplanted cy rOvaries into single cells. On the other hand, we analyzed the maturation dynamics of cy fetal oocytes under the xenotransplantation condition primarily through histological analyses, which allowed us to analyze the entire cy rOvary structures and revealed that, upon xenotransplantation, cy fetal oocyte development and the meiotic prophase I proceed in an apparently normal fashion, although the developmental progression seemed somewhat slower compared to that *in vivo* (Fig 2B–D). We provided an appropriate explanation in the revised manuscript (“**Transcriptome dynamics for cy fetal ovary development *in vivo*, in xenotransplantation, and *in vitro***” section, 4<sup>th</sup> paragraph).

*4. Panel 4K: what was the criteria to select those specific genes? Could the authors plot the genes that characterise the clusters identified in panel 4H?*

**Response 7.** For Fig 4K, we selected a minimum set of genes that differentially label mitotic, RA-responsive, meiotic, and oogenic cells.

In response to the Reviewer’s comment, we analyzed the expression of highly variable



genes (HVGs) identified by the scRNA-seq analysis with the 10X Chromium platform (Fig 4H) in the scRNA-seq data generated with the SC3-seq method along the pseudo-time trajectory, as shown in Fig 4G. We also performed the same analysis for the human SC3-seq data using the human orthologues of the HVGs. These analyses revealed similar gene-expression dynamics of the HVGs and their orthologues in the SC3-seq data for cy/h fetal oocyte development *in vivo* as well as *in vitro* (Appendix Fig S4A and B), underscoring the consistency between the scRNA-seq analyses with the 10X Chromium platform and the SC3-seq as well as the similarity of cy/h fetal oocyte development *in vivo* and *in vitro*. We provided these data and relevant discussion in the revised manuscript (Appendix Fig S4A and B, “**Transcriptome dynamics for cy fetal ovary development *in vivo*, in xenotransplantation, and *in vitro***” section, 4<sup>th</sup> paragraph; “**Reconstitution of human fetal oocyte development *in vitro***” section, 3<sup>rd</sup> paragraph).

*5. Discussion: the authors have previously shown that human primordial germ cell like cells (hPGCLCs) can be differentiated in vitro into oogonia. I think the next natural step would be to apply the protocol describe in this manuscript to attempt further maturation of the hPGCLC-derived oogonia. This is something that perhaps the authors could mention in the discussion.*

**Response 8.** We would like to thank the Reviewer for this comment. We provided relevant statements in the revised manuscript (**INTRODUCTION** section, 4<sup>th</sup> paragraph; **DISCUSSION** section, 5<sup>th</sup> paragraph).

*6. In certain parts the paper looks like a catalog of genes. I think the text could be simplified by providing some of the information on markers genes as a supplementary table instead.*

**Response 9.** In response to the Reviewer’s suggestion, we have minimized or entirely removed multiple gene lists in the relevant parts of the main text. The full gene lists are still available in Table EV3 and EV5.

**Reviewer: 2**

*Summary: In this manuscript, the authors optimized an in vitro culture condition for fetal oocyte development both in humans and monkeys, showing that mitotic oogonia enter into and complete the first meiotic prophase to form primordial follicles. They demonstrated that fetal oocyte development in both species can be faithfully reconstituted in vitro based on cytological and single-cell transcriptomic analysis. Furthermore, by comparing single-cell transcriptomes among humans, monkeys and mice, they identified evolutionary conserved and primate-specific transcriptional and cellular programs during fetal oocyte development.*

*The present manuscript is potentially important because it provides new insights into primate-specific transcriptional and cellular programs during fetal oocyte development.*

*However, their main claims based on transcriptomic analysis are not well supported by data presented.*

*Major points:*

*1. Fig EV3E: The authors should provide the proportion of the predicted cell cycle phase (G1, S, and G2/M) of cells across cell types, and check whether the cell cycle assignments are consistent with their conclusions based on marker expression and GO enrichment analysis.*

**Response 1.** To address the Reviewer's request, we assigned the cell-cycle phase of cy germ cells using the "Cell-Cycle Scoring" function of the Seurat package based on the strategy described in Tirosh *et al.* (Tirosh, Izar *et al.*, 2016). Since our datasets include oocytes in meiotic prophase I, we used the orthologous genes from the annotation list of the meiotic cells in Shimada *et al.* (Shimada, Koike *et al.*, 2021) to assign the meiotic prophase I. Because this widely used scoring method does not distinguish meiotic from mitotic G1/S/G2 phases, the annotated cell-cycle phases correspond to the sum of the mitotic and meiotic phases (Appendix Fig S2B), which is highly consistent with our conclusion shown in Fig EV3B. Additionally, in accord with our annotation, this result assigned both mitotic and pre-leptotene 1/2/3 to G1, S, and G2/M, despite relatively minor annotation differences, which would presumably be because the Seurat method uses markers defined in human and mouse somatic cells (Tirosh *et al.*, 2016) (Appendix Fig S2A–C). We provided these data and relevant discussion in the revised manuscript (Appendix Fig S2A–C, "**Transcriptome dynamics for cy fetal ovary development *in vivo*, in xenotransplantation, and *in vitro***" section, 2<sup>nd</sup> paragraph).

*2. Fig 4G: The trajectory graph should be provided. The heatmap showing the pseudo-temporal expression patterns of HVGs should be also provided, and this should be consistent with Fig 4H.*

**Response 2.** In response to the Reviewer's request, we drew a cell-fate trajectory line using the Monocle 3 package and displayed it on the UMAP in Fig 4G. We then defined the variable genes based on the Moran's *I* statistic using the Monocle 3 package and displayed the expression patterns of these genes as well as the HVGs defined in Fig 4H along the pseudo-time developmental trajectory, both of which provided an outcome consistent with the data in Fig 4H (Appendix Fig S3A and B). We added these data and relevant discussion to the revised manuscript (Fig 4G, Appendix Fig S3A and B, "**Transcriptome dynamics for cy fetal ovary development *in vivo*, in xenotransplantation, and *in vitro***" section, 3<sup>rd</sup> paragraph).

*3. Fig 4J-L: The main claim that cy fetal germ cells undergo appropriate transcriptomic maturation *in vitro*" was not well supported. The newly generated scRNA-seq data have too small number of cells to be properly analyzed. To address this issue, the *in vivo* scRNA-seq data in Fig 4D should be served as a reference map to understand all the scRNA-seq data. For this, each data should be projected into the UMAP in Fig 4D*

*based on the transcriptomic similarity. The pseudo-temporal expression patterns of genes among data should be compared in a more systematic way.*

**Response 3.** Please note that SC3-seq is a highly sensitive scRNA-seq method that allows a quantitative comparison of single-cell gene expression profiles with a minimum of ~four–eight single cells (Nakamura et al., 2015). Accordingly, we performed a more careful comparison of the gene expression between cy fetal oocytes *in vivo* and *in vitro* using the SC3-seq data. We found that the correlation coefficients between *in vivo* and *in vitro* RA-responsive/meiotic/oogenic cells in all the expressed genes were 0.968/0.968/0.982, respectively (Appendix Fig S5B in the revised manuscript). The differentially expressed genes (DEGs) (those exhibiting more than 4-fold expression differences (Nakamura et al., 2015)) between *in vivo* and *in vitro* RA-responsive/meiotic/oogenic cells were few in number, but included some key genes for oocyte development, including *ZGLP1*, *REC8* (RA-responsive), *SOHLH1*, *NOBOX* (meiotic), *NLRP4*, and *ZP4* (oogenic) (Table EV4). Examination of their expression along the pseudo-time developmental trajectory suggested that while the differential expression of *SOHLH1*, *NOBOX* (meiotic), *NLRP4*, and *ZP4* (oogenic) may result from a difference in meiotic/oogenic stages in the cell populations used for the comparison, the differential expression of *ZGLP1* and *REC8* (RA-responsive) may reflect a significant difference (Appendix Fig S5C), which could explain why the pre-leptotene to leptotene transition may be a rate-limiting step under the current culture condition (Fig 3G). Collectively, these facts lead us to conclude that *in vivo* and *in vitro* fetal oocytes are highly similar in gene expression, but the up-regulation of some genes for the pre-leptotene to leptotene transition may not be optimal under the current *in vitro* culture condition. We provided relevant data and discussion in the revised manuscript (Appendix Fig S5, Table EV4, “**Transcriptome dynamics for cy fetal ovary development *in vivo*, in xenotransplantation, and *in vitro***” section, 4<sup>th</sup> paragraph) (please also see **Response 4** to the **Reviewer 1**).

Additionally, according to the Reviewer’s comment, we projected the query data, i.e., 10X scRNA-seq data for *in vitro* cy germ cells at 12/15 w-ivc, onto the mutual nearest neighbor (MNN)-corrected PCA space constructed from the reference 10X scRNA-seq data for *in vivo* cy germ cells, which demonstrated a clear overlap of the *in vitro* cells with the *in vivo* cells (Fig R1A). On the other hand, by performing the same analysis for *WT1*<sup>+</sup> cy pre-granulosa cells, we noted that this suggested method, i.e., the projection of the *in vitro* query data onto the *in vivo* reference data, results in masking the differences between the query and reference data on the UMAP space (Fig R1B). We therefore decided to use the original method and present the original data in the revised manuscript. We hope that our decision meets the approval of the Reviewer.

Furthermore, as described above in **Response 2**, we examined the pseudo-temporal expression patterns of the HVGs shown in Fig 4H and their human orthologues for both 10X scRNA-seq and SC3-seq data for cy/h fetal oocyte development *in vivo* and *in vitro*,

which demonstrated highly similar gene-expression changes along the pseudo-time developmental trajectory during cy/h fetal oocyte development *in vivo* and *in vitro* (Appendix Fig S3 and S4) (please also see **Response 7** to **Reviewer 1**). Taken together, as stated in the original manuscript, these findings led us to conclude that cy fetal germ cells undergo appropriate transcriptome maturation in cy rOvaries *in vitro*. We provided relevant data and discussion in the revised manuscript (Fig 4D and 4J, Appendix Fig S3–5, Table EV4, “**Transcriptome dynamics for cy fetal ovary development *in vivo*, in xenotransplantation, and *in vitro***” section, 3<sup>rd</sup>/4<sup>th</sup> paragraph; “**Reconstitution of human fetal oocyte development *in vitro***” section, 3<sup>rd</sup> paragraph).

4. Fig EV4F: A substantial number of cells at 12/15 w-ivc were merged with cluster 4. What is the characteristics of these cells?

**Response 4.** We would like to thank the Reviewer for this constructive comment. We performed further analysis of cluster d in Appendix Fig S6A (cluster 4 in the original manuscript; please also see **Response 10** below), and found that this cluster consists not only of a subset of granulosa cells in cy rOvaries at 12/15 w-ivc (~50%), but also of similar cells in cy fetal ovaries *in vivo* (~50%), particularly those at 16 wpf (Appendix Fig S6B). The HVGs in this cluster were enriched with genes for “extracellular matrix organization,” “angiogenesis,” and “cell-cell adhesion” (Appendix Fig S6C). While the identity and the function of this granulosa-cell subset are unclear (and we consider their clarification beyond the scope of this manuscript), they are present in both cy rOvaries *in vitro* and fetal ovaries *in vivo*, providing further evidence that the *in vitro* culture of cy rOvaries recapitulates the fetal ovary development *in vivo*. We provided relevant data and discussion in the revised manuscript (Appendix Fig S6, “**Transcriptome dynamics for cy fetal ovary development *in vivo*, in xenotransplantation, and *in vitro***” section, 5<sup>th</sup> paragraph).

5. Fig 5E-G: This human *in vitro* scRNA-seq data should be projected into the reference map in Fig 4D and the pseudo-temporal expression patterns should be carefully compared.

**Response 5.** Please see **Response 3**.

6. Fig 6D: This difference between humans and mice might be driven by the sampling issue. It seems that human cells were enriched in the mitotic compartment, but mouse cells were evenly distributed across cell types. The authors should carefully address this issue.

**Response 6.** We would like to thank the Reviewer for this thoughtful comment. In accord with the Reviewer’s suggestion, we first attempted to create datasets consisting of evenly distributed cell populations by random selection, but due to a low number of human fetal oocytes after the zygotene stage in the human 10X dataset (Chitashvili, Dror et al., 2020), we found that this strategy was not quite effective. We therefore

adopted two methodologies: first, we adjusted the cell-type ratios in all the datasets by random selection (Fig R2A), and performed a pseudo-time analysis for each dataset, which revealed that, consistent with our claim based on the original analysis (Fig 6D), humans and monkeys exhibit larger transcriptomic alterations upon the mitotic to pre-leptotene transition than those observed in mice (Fig R2B). Second, to avoid an unpredictable influence of data merging by CCA, we performed the cell-type annotation and pseudo-time analysis on each dataset separately, and this approach also demonstrated a primate-specific major transcriptomic alteration upon the mitotic to pre-leptotene transition (Fig R3A). Additionally, we ran the original analysis pipeline using two other mouse datasets with very different cell-type proportions (Ge, Wang et al., 2021, Zhao, Ma et al., 2020), which gave essentially the same outcome—namely, an overlapping gene-expression profile between mitotic and pre-leptotene/leptotene cells in mice (Appendix Fig S8A and B). These data strongly support our original claim. Accordingly, we decided to present the original analysis as well as that using the two other mouse datasets and the relevant discussion in the revised manuscript (Fig 6A–D, Appendix Fig S8A and B, **“Primate-specific program for fetal oocyte development”** section, 2<sup>nd</sup> paragraph). We sincerely hope that the Reviewer approves our decision.

7. *Fig 6E: The authors should evaluate the robustness of their claim by using all expressed orthologous genes common to the three species.*

**Response 7.** We calculated the correlation coefficients among fetal oocyte cell types using all expressed orthologous genes (12,390 genes) common to the three species (Fig R4). The results were highly consistent with our original data using the 237 HVGs (Fig 6E), although the correlation coefficients were higher overall, which was most likely due to the inclusion of many constantly expressed genes.

8. *Fig 6F: The expression patterns of 83 genes showing specific expression changes in humans and monkeys should be also examined in the other mouse data to confirm the robustness of this finding (Zhao et al. and Ge et al.)*

**Response 8.** We have generated heatmap figures showing the expression of the 83 genes with specific expression changes in humans and monkeys as well as the 137 genes with common expression changes in humans, monkeys, and mice in the other two mouse datasets (Ge et al., 2021, Zhao et al., 2020) (Appendix Fig S8C and D), and these new heatmap figures were consistent with the original data in Fig 6F. We added the data and relevant discussion to the revised manuscript (Appendix Fig S8C and D, **“Primate-specific program for fetal oocyte development”** section, 3<sup>rd</sup> paragraph).

9. *Fig 7D: This analysis might be also affected by the sampling issue because each cell type has the different number of cells. I'm wondering whether the main conclusion is not affected if we fix the number of cells across cell types.*

**Response 9.** In response to the Reviewer's comment, we performed the relevant

analysis using the same approach as described above in **Response 6**. Both analyses, i.e., the analysis with the same cell-type ratio for humans, monkeys, and mice (Fig R2C), and the individual data analysis without CCA (Fig R3B) gave an outcome essentially consistent with our original analysis and conclusion (Fig 7D). Additionally, we confirmed the same X:A ratio dynamics along fetal oocyte development when using the other two mouse datasets (Fig EV5D). We provided the data and relevant discussion in the revised manuscript (Fig 7D, Fig EV5D, “**Conserved activities of X chromosomes**” section, 3<sup>rd</sup> paragraph).

*Minor points:*

1. Fig 3E: The time information was not well distinguished. It would be better to present this like Fig 3B.

**Response 10.** We have modified Fig 3E to present the images along the time course by replacing the IF images for SYCP1 and  $\gamma$ H2AX at 6 w-ivc with those at 9 w-ivc.

2. Fig EV4F: The clusters should be renamed to avoid the confusion arisen from clusters in Fig EV4A.

**Response 11.** We have renamed the clusters “Clusters a–n” (Fig EV4F or Appendix Fig S6A). We also moved Fig EV4F/G in the original manuscript to the appendix as Appendix Fig S6A, B, and D in order to streamline the data presentation.

### **Reviewer: 3**

*In the manuscript entitled "Ex vivo reconstitution of fetal oocyte development in humans and monkeys", Ken Mizuta and colleagues deeply studied the female germ line development in primates using Cynomolgus monkey and human models. The study provides an extremely well detailed characterization of oogenesis in Cy monkeys in vivo and ex vivo by both IF and transcriptomics. With an extensive analysis of different culture medium components, cell culture coating and set-up, the authors have successfully recapitulated in vitro maturation of Cy fetal ovaries. They then adapted their protocol to human fetal ovaries with success. Transcriptomic analysis of human, monkey and mouse datasets (either produced by the authors or from public datasets) showed important evolutionary-conserved and primate-specific as well as species-specific genes involved in oogenesis development.*

*One of the specificities of female germline development is X-chromosome reactivation (XCR) and question remains open if this is linked to excess of X-linked gene expression, with contradictory studies in humans (Sangrithi et al., 2017 and Chitiashvili et al., 2020). Based on their datasets and public ones, the authors analysed X:autosome ratio and concluded little to no X-linked gene excess despite XCR, due to erasure of X-chromosome upregulation. This is significant results for the X-chromosome regulation field. However, before formally supporting this conclusion, the authors should reanalyse the datasets from Sangrithi study with their bioinformatics pipeline.*

**Response 1.** In response to the Reviewer’s comment, we re-analyzed the mouse bulk RNA-seq datasets by Sangrithi *et al.* using our bioinformatics pipeline. Our results were similar to theirs, but we noted that the quality of their data was somewhat more variable: for example, for gonadal somatic cells, which should serve as a control, the Chr3:A ratio ranged from ~1.0–1.5 (ours: ~1.0–1.1), the X:A ratio ranged from ~0.76–1.6 (ours: ~0.82–0.95), and the *Xist* expression levels [ $\log_2(\text{normalized fragment counts}+1)$  value] ranged from ~1.3–3.8 (ours: ~4.1–5.7) (Appendix Fig S9). However, only 2–5 replicates were sampled for germ cells at each embryonic stage: for example, the X:A ratios of two datasets of germ cells at E12.5 were ~0.9, while those of the other two were ~1.2, making it somewhat difficult to draw a definitive conclusion.

In addition to using the data with better quality, we have drawn our conclusion based on two different experimental/analytical methods (10X and SC3-seq/bulk 3'-seq) to evaluate the X:A ratio dynamics in humans, monkeys, and mice under equivalent conditions. In particular, we considered that the cross-species consistency of the 10X data, which involves a huge number of cells, to be highly supportive of our conclusion. We added the data and relevant discussion to the revised manuscript (Appendix Fig S9, “**Conserved activities of X chromosomes**” section, 2<sup>nd</sup> paragraph; **DISCUSSION** section, 5<sup>th</sup> paragraph).

*Furthermore, how to measure X:A ratios has been debated here (Kharchenko et al., 2011). It would then be important to support the manuscript conclusions with X:A ratios measurement based on these recommendations (Kharchenko et al, 2011).*

**Response 2.** In response to the Reviewer’s suggestion, we re-calculated all the data according to the method suggested by *Kharchenko et al.* (2011) (Kharchenko, Xi et al., 2011). Specifically, we excluded genes in the pseudo-autosomal region (PAR) from the analysis and examined stepwise thresholds for excluding lowly expressed genes. As shown in Fig R5A, as the threshold increased, the number of genes used for the analysis declined, and the analysis results came to represent increasingly sparse information, but, critically, the overall dynamics of the X:A ratio remained essentially the same (Fig R5B).

In our original analysis of the 10X data, we also excluded the lowly expressed genes from the analysis, i.e., only genes with their UMIs detected in more than two cells were used for the analysis. As to the RNA-seq/SC3-seq data, we used the 75th-percentile  $\log_2$  (normalized read counts+1) values of the expressed genes in individual samples/cells as representative values in the samples/cells, and accordingly, the lowly expressed genes were not included in the analysis. We therefore performed a further analysis with exclusion of the PAR genes and found that the results were essentially the same (Fig R6A–C). These findings strongly support our original claim, and thus we decided to present the original analysis in the revised manuscript. We sincerely hope that the Reviewer approves our decision.

*Minor concerns:*

*- Number of analysed cells and/or number of biological replicates are often missing and should be given in figure legends (i.e. Fig2D, 3F,EV1, EV2). Number of performed xenotransplantation experiments should be stated.*

**Response 3.** We provided precise numbers of cells analyzed and biological replicates, including those for the xenotransplantation experiments, in the relevant figure legends in the revised manuscript.

*- Introduction of X-chromosome regulation (and then Figure 7) should be included in the introduction section.*

**Response 4.** In response to the Reviewer's comment, we provided a brief introduction on the X-chromosome regulation and its relevance to Figure 7 in the 2<sup>nd</sup> paragraph of the **INTRODUCTION** section in the revised manuscript.

*- Colour choices of Late pachytene and diplotene make it difficult to read, especially on printed version.*

**Response 5.** In response to the Reviewer's comment, we have changed the color of the diplotene to black for easier distinction throughout the revised manuscript.



## LEGENDS TO FIGURES FOR THE REVIEWERS

### **Figure R1. Projection of the *in vitro* data onto the *in vivo* reference UMAP.**

UMAP plots for germ cells (A) and granulosa cells (B) from *in vivo* cy ovaries and *in vitro* cy rOvaries. Query data, i.e., cy germ cells from cultured rOvaries at 12/15 w-ivc, were projected onto the MNN-corrected PCA space, which was the reference constructed from *in vivo* fetal cy germ cells. The procedure consists of 1) cosine-normalization, 2) subtraction of the reference grand center, and 3) transformation by reference eigenvectors. The batch effect between reference and query PCA was corrected on PC1-30 using the “reducedMNN” function (“batchelor” R package) with the default parameters, followed by projection of the query data onto the reference map with the “RunUMAP” function.

### **Figure R2. Cross-species comparison of fetal oocyte development with 10X scRNA-seq datasets matched for cellular composition ratios.**

(A) The numbers of germ cells at each meiotic sub-stage in the human/cy/mouse matched datasets. Cells were randomly selected to match the germ-cell sub-stage composition in each dataset. (B) The distribution of germ cells along the individually calculated species-specific pseudo-time trajectories. (C) The autosome:A and X:A ratios (top), and *XIST/Xist* expression transitions (bottom) during fetal oocyte development in the three species. M, mitotic; PL, pre-leptotene; L, leptotene; Z, zygotene; P, pachytene; D, diplotene.

### **Figure R3. Cross-species comparison of fetal oocyte development by individual analyses of the 10X scRNA-seq datasets.**

(A) The distribution of germ cells along the pseudo-time trajectories. The meiotic sub-stages were individually annotated for each dataset. (B) The autosome:A and X:A ratios (top), and *XIST/Xist* expression transitions (bottom) during fetal oocyte development in the three species. The meiotic sub-stages were individually annotated for each dataset. M, mitotic; PL, pre-leptotene; L, leptotene; Z, zygotene; P, pachytene; D, diplotene.

### **Figure R4. Correlation of gene expression during fetal oocyte development in humans, monkeys, and mice.**

Heatmap of the Pearson correlation coefficients of the average expression levels of all expressed genes (1-1-1 orthologous, 12,390 genes) among the meiotic sub-stages in humans, monkeys, and mice. The color-coding for the germ cell stage is as indicated.

### **Figure R5. X:A ratios during fetal oocyte development analyzed with various gene expression thresholds.**

All 10X scRNA-seq datasets were reanalyzed following the method discussed in Kharchenko *et al.* (2011) (Kharchenko et al., 2011). (A) The numbers of the genes on

the chromosome (chr.) X, A, and all autosomes with the indicated thresholds for excluding low expression genes. (B) The autosome:A and X:A ratios during fetal oocyte development *in vivo* in the three species analyzed with four different gene thresholds. Each threshold is defined in Fig R5A.

**Figure R6. Re-analyses of the X:A ratios by excluding the genes on the pseudo-autosomal region.**

The bulk RNA-seq/SC3-seq datasets were re-analyzed by excluding genes on the pseudo-autosomal region. (A) The Chr.3:A and X:A ratios in mouse fetal/neonatal gonadal cells analyzed by bulk RNA-seq. Dots, individual data points; bar, mean. Samples at E9.5/10.5 include germ cells from male and female embryos (mix). E, embryonic day; P, postnatal day; Soma, gonadal somatic cells. (B) The Chr.15:A and X:A ratios in cy female germ cells *in vivo* and in cultured/transplanted rOvaries analyzed by SC3-seq. The Chr.15:A/X:A ratio transitions in the embryonic and hypoblast lineages reported by Okamoto *et al.* (2021) (Okamoto, Nakamura *et al.*, 2021) are also shown. ESC, embryonic stem cell; ICM, inner cell mass; Pre\_EPI, pre-implantation epiblast; PostE\_EPI, post-implantation early epiblast; PostL\_EPI, post-implantation late epiblast; Gast, gastrulating cells; ePGC, early primordial germ cells. Data with a small sample size ( $n \leq 3$ ) are indicated with dots (individual data points) and bars (mean). (C) The Chr.10:A and X:A ratios in human fetal oocytes *in vivo* and in cultured rOvaries analyzed by SC3-seq.

**References**

- Chitiashvili T, Dror I, Kim R, Hsu FM, Chaudhari R, Pandolfi E, Chen D, Liebscher S, Schenke-Layland K, Plath K, Clark A (2020) Female human primordial germ cells display X-chromosome dosage compensation despite the absence of X-inactivation. *Nat Cell Biol* 22: 1436-1446
- Ge W, Wang JJ, Zhang RQ, Tan SJ, Zhang FL, Liu WX, Li L, Sun XF, Cheng SF, Dyce PW, De Felici M, Shen W (2021) Dissecting the initiation of female meiosis in the mouse at single-cell resolution. *Cell Mol Life Sci* 78: 695-713
- Kharchenko PV, Xi R, Park PJ (2011) Evidence for dosage compensation between the X chromosome and autosomes in mammals. *Nat Genet* 43: 1167-9; author reply 1171-2
- Nakamura T, Yabuta Y, Okamoto I, Aramaki S, Yokobayashi S, Kurimoto K, Sekiguchi K, Nakagawa M, Yamamoto T, Saitou M (2015) SC3-seq: a method for highly parallel and quantitative measurement of single-cell gene expression. *Nucleic Acids Res* 43: e60
- Okamoto I, Nakamura T, Sasaki K, Yabuta Y, Iwatani C, Tsuchiya H, Nakamura SI, Ema M, Yamamoto T, Saitou M (2021) The X chromosome dosage compensation program during the development of cynomolgus monkeys. *Science* 374: eabd8887
- Shimada R, Koike H, Hirano T, Kato Y, Saga Y (2021) NANOS2 suppresses the cell

cycle by repressing mTORC1 activators in embryonic male germ cells. *iScience* 24: 102890

Tirosh I, Izar B, Prakadan SM, Wadsworth MH, 2nd, Treacy D, Trombetta JJ, Rotem A, Rodman C, Lian C, Murphy G, Fallahi-Sichani M, Dutton-Regester K, Lin JR, Cohen O, Shah P, Lu D, Genshaft AS, Hughes TK, Ziegler CG, Kazer SW et al. (2016) Dissecting the multicellular ecosystem of metastatic melanoma by single-cell RNA-seq. *Science* 352: 189-96

Zhao ZH, Ma JY, Meng TG, Wang ZB, Yue W, Zhou Q, Li S, Feng X, Hou Y, Schatten H, Ou XH, Sun QY (2020) Single-cell RNA sequencing reveals the landscape of early female germ cell development. *FASEB J* 34: 12634-12645

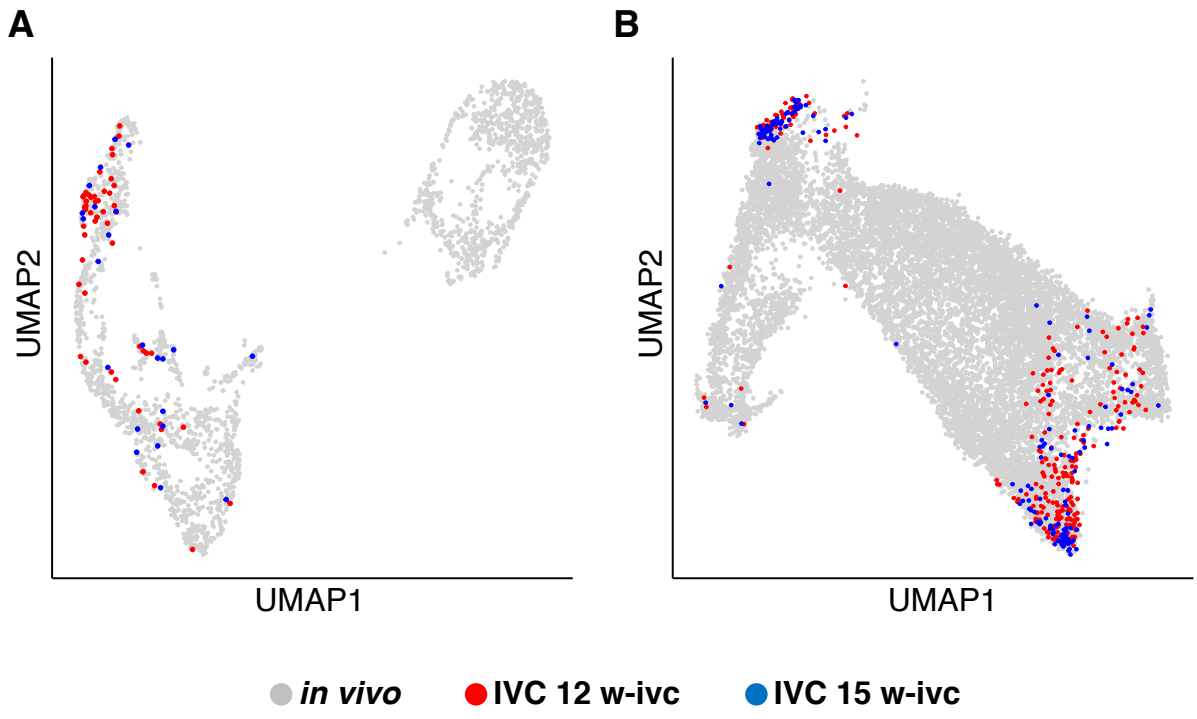

**A**

| Germ-cell stage (%) |         | Human<br><i>Chitiashvili et al.</i> | Monkey | Mouse<br><i>Niu et al.</i> |
|---------------------|---------|-------------------------------------|--------|----------------------------|
| Mitosis             | (28.1%) | 171                                 | 286    | 540                        |
| Pre-leptotene       | (32.1%) | 196                                 | 327    | 617                        |
| Leptotene           | (23.3%) | 142                                 | 237    | 447                        |
| Zygotene            | (4.2%)  | 26                                  | 43     | 82                         |
| Pachytene           | (10.0%) | 61                                  | 102    | 192                        |
| Diplotene           | (2.3%)  | 14                                  | 23     | 43                         |
| Total               |         | 610                                 | 1018   | 1921                       |

**B**

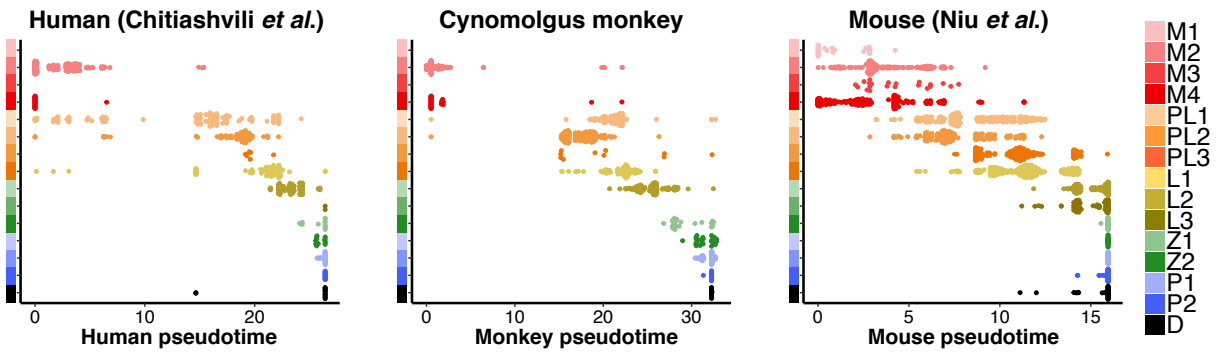

**C**

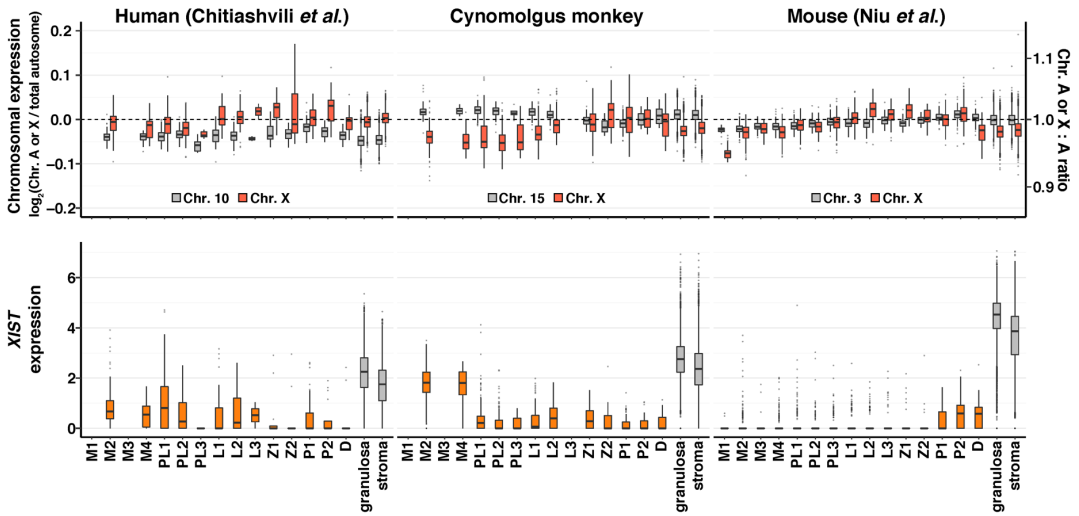

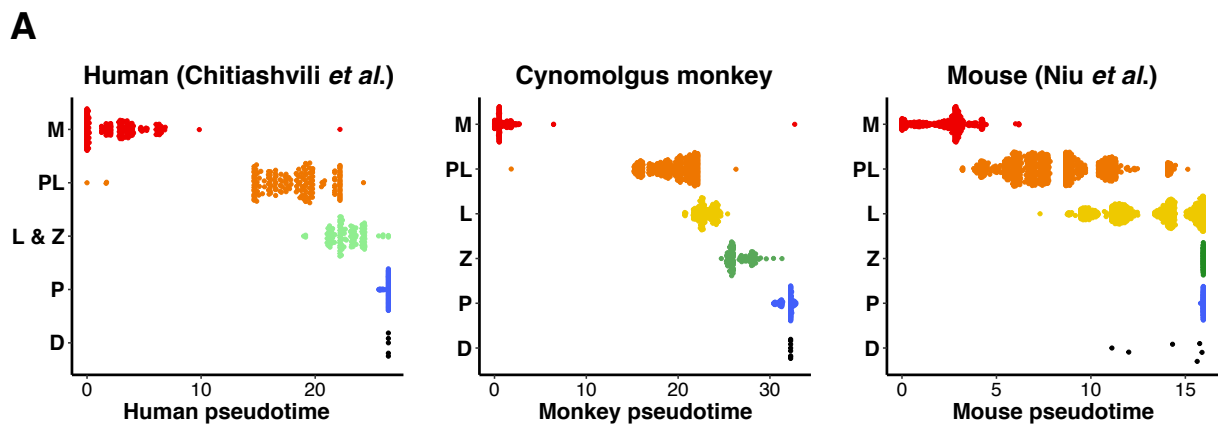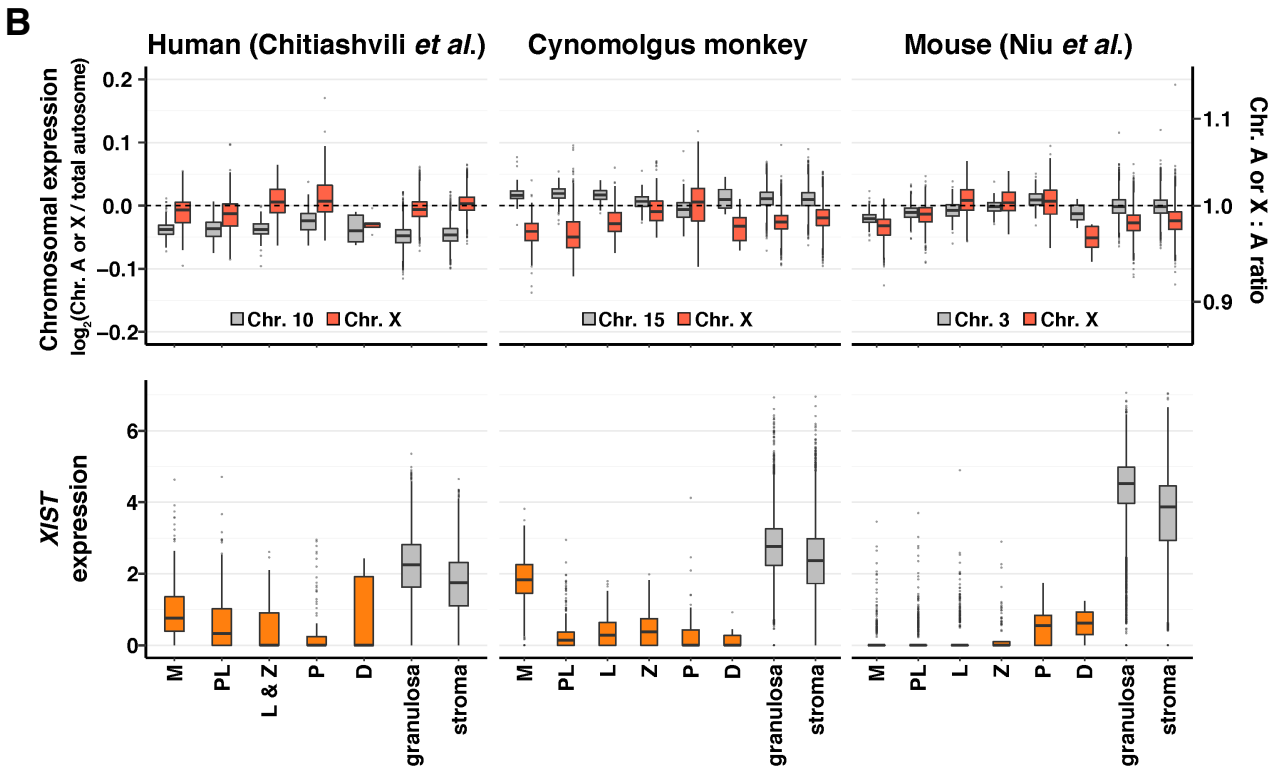

Mizuta et al., Figure R4

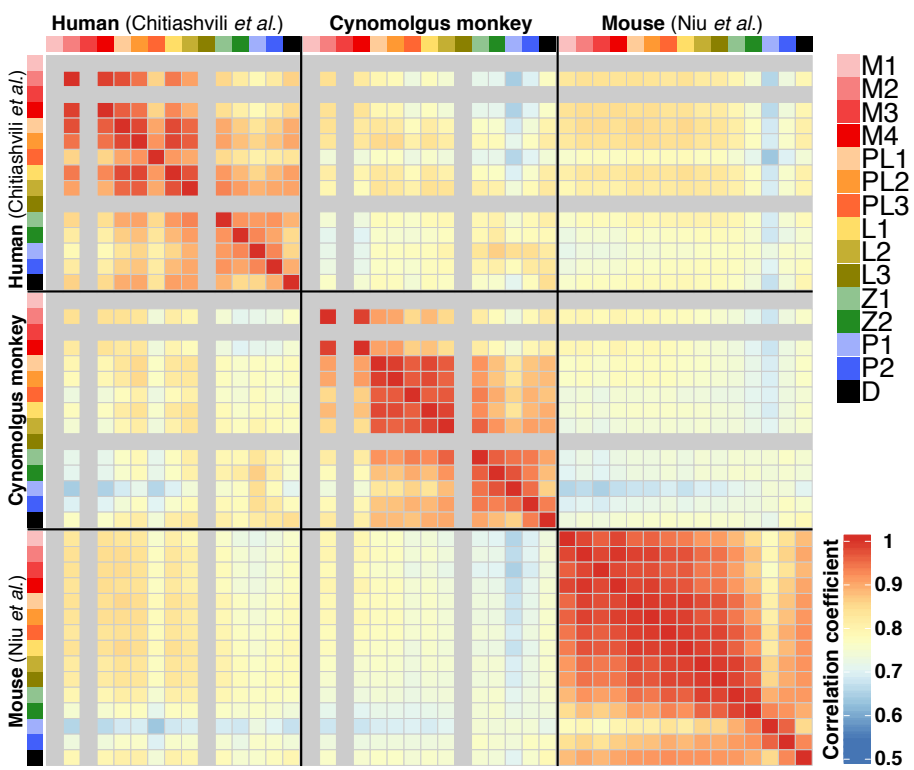

**A**

|                                                                                                     |               | Human  | Human<br>Chitiashvili <i>et al.</i> | Monkey | Mouse<br>Niu <i>et al.</i> | Mouse<br>Zhao <i>et al.</i> | Mouse<br>Ge <i>et al.</i> |
|-----------------------------------------------------------------------------------------------------|---------------|--------|-------------------------------------|--------|----------------------------|-----------------------------|---------------------------|
| No threshold (i.e., all genes)                                                                      | chr. X        | 858    | 858                                 | 839    | 961                        | 961                         | 961                       |
|                                                                                                     | chr. A        | 739    | 739                                 | 784    | 985                        | 985                         | 985                       |
|                                                                                                     | all autosomes | 19,095 | 19,095                              | 19,175 | 20,633                     | 20,633                      | 20,633                    |
| 【Threshold in Fig 7D & EV5D】<br>$\log_2(\text{ss10kUMI}+1) > 0$ in more than 2 cells                | chr. X        | 716    | 725                                 | 791    | 744                        | 687                         | 697                       |
|                                                                                                     | chr. A        | 667    | 682                                 | 736    | 896                        | 808                         | 847                       |
|                                                                                                     | all autosomes | 16,862 | 17,190                              | 18,066 | 17,698                     | 16,545                      | 16,821                    |
| 【Threshold #1】<br>$\log_2(\text{ss10kUMI}+1) > 1$ in more than 2 cells,<br>without genes on the PAR | chr. X        | 587    | 587                                 | 701    | 618                        | 505                         | 557                       |
|                                                                                                     | chr. A        | 573    | 574                                 | 655    | 777                        | 602                         | 689                       |
|                                                                                                     | all autosomes | 14,443 | 14,585                              | 15,972 | 15,357                     | 12,441                      | 13,931                    |
| 【Threshold #2】<br>$\log_2(\text{ss10kUMI}+1) > 2$ in more than 2 cells,<br>without genes on the PAR | chr. X        | 512    | 497                                 | 625    | 546                        | 399                         | 470                       |
|                                                                                                     | chr. A        | 511    | 507                                 | 581    | 685                        | 473                         | 584                       |
|                                                                                                     | all autosomes | 12,672 | 12,661                              | 14,349 | 13,527                     | 9,755                       | 11,595                    |
| 【Threshold #3】<br>$\log_2(\text{ss10kUMI}+1) > 3$ in more than 2 cells,<br>without genes on the PAR | chr. X        | 421    | 403                                 | 570    | 481                        | 307                         | 371                       |
|                                                                                                     | chr. A        | 443    | 416                                 | 520    | 606                        | 375                         | 476                       |
|                                                                                                     | all autosomes | 10,962 | 10,747                              | 13,040 | 11,712                     | 7,625                       | 9,258                     |

**B**

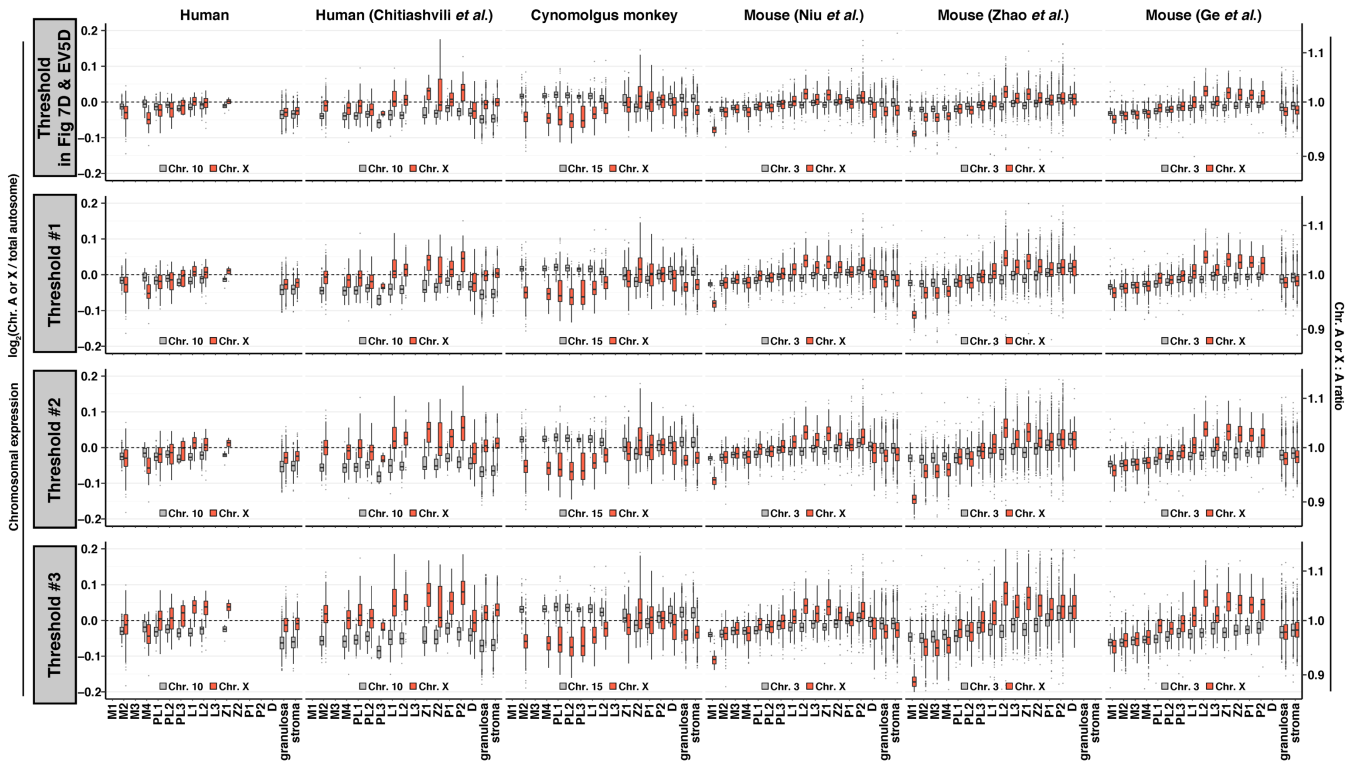



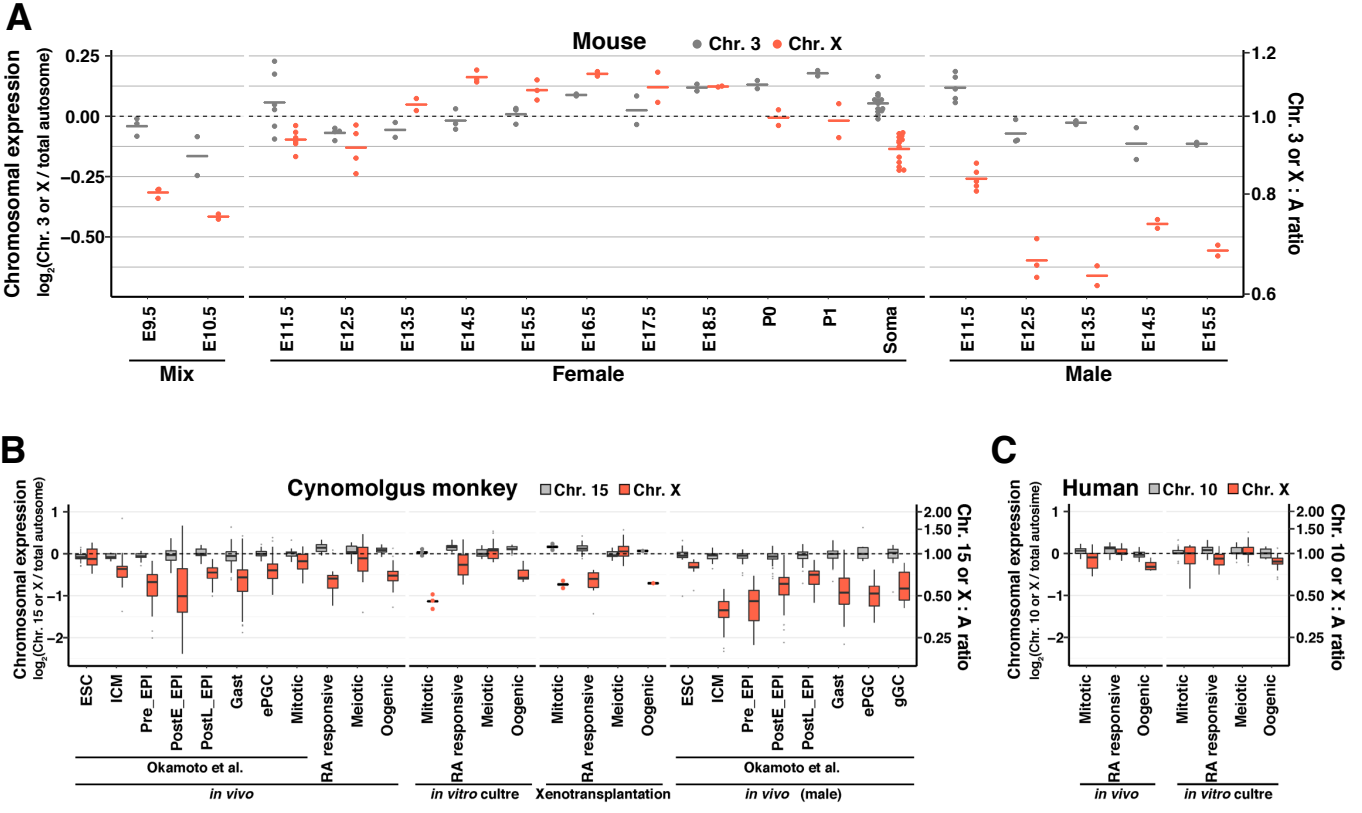

Dear Mitinori,

Thank you for submitting your revised manuscript (EMBOJ-2022-110815R) to The EMBO Journal. Your amended study was sent back to the three referees for their reassessment, and we have received comments from all of them, which I enclose below. As you will see, the experts stated that their issues have been comprehensively resolved and they are now broadly in favour of publication.

Thus, we are pleased to inform you that your manuscript has been accepted in principle for publication in The EMBO Journal.

We need you to take care of a number of minor issues related to formatting and data presentation as detailed below, which should be addressed at resubmission.

Please contact me at any time if you have additional questions related to below points.

Thank you for giving us the chance to consider your manuscript for The EMBO Journal. I look forward to your final revision. to the swiftly proceed with acceptance of your article.

Again, please contact me at any time if you need any help or have further questions.

Kind regards,

Daniel

Daniel Klimmeck PhD  
Senior Editor  
The EMBO Journal

\*\*\*\*

Formatting changes required for the revised version of the manuscript:

>> Please adjust the title of the 'Conflict of Interests' section to 'Disclosure and Competing Interests Statement'.

>> Data accessibility section: add an http link for the GEO dataset and release privacy at the acceptance date.

>> Author Contributions: specify contributions of M.Nak. versus M.Nag. in the Credit list.

>> Dataset EV legends: Tables EV1-EV8 & EV10 should all be renamed as Dataset EV#. Table EV9 should be changed to 'Table EV1'. The legends should be removed from the manuscript file.

>> Manuscript order: please move Materials & Methods after the Discussion section.

>> Indicate redisplay of Fig6E <'Mouse (Niu et al)' vs 'Mouse (Niu et al)'\> part in the legend of Figure S8B.

>> Revise and amend figure callouts and their order. Fig EV2E callout is missing. Appendix Fig S4 is called out after S6. Appendix Fig S8A&B are called out before Appendix Fig S7C.

>> The Reagents and Tools table should be removed from the manuscript file, as it is already uploaded separately as a Reagents Table.

>> Please consider additional changes and comments from our production team as indicated by the .doc file enclosed and leave changes in track mode.

\*\*\*\*

Further information is available in our Guide For Authors: <https://www.embopress.org/page/journal/14602075/authorguide>

Please use the link below to submit your revision:

Link Not Available

-----

Referee #1:

The authors have successfully addressed all of my comments. I support the publication of this manuscript in The EMBO journal.

Referee #2:

The authors have satisfactorily addressed my comments.

Referee #3:

This manuscript from the Saitou's laboratory is of high importance for the scientific community. I am satisfied with the answers to my review as well as to the two other reviewers.

I am supporting this manuscript for publication in EMBO Journal.

**Rebuttal: EMBOJ-2022-110815R**

**Reviewers' comments**

**Reviewer #1:**

*The authors have successfully addressed all of my comments. I support the publication of this manuscript in The EMBO journal.*

**Reviewer #2:**

*The authors have satisfactorily addressed my comments.*

**Reviewer #3:**

*This manuscript from the Saitou's laboratory is of high importance for the scientific community. I am satisfied with the answers to my review as well as to the two other reviewers. I am supporting this manuscript for publication in EMBO Journal.*

**Responses to the Reviewers:**

We would like to sincerely thank the Reviewers for their approval and encouraging comments on our manuscript.

Dear Mitinori,

Thank you for submitting the revised version of your manuscript EMBOJ-2022-110815R1. I have now evaluated your amended manuscript and concluded that the remaining minor concerns have been sufficiently addressed.

Thus, I am pleased to inform you that your manuscript has been accepted for publication in the EMBO Journal.

Please note that it is EMBO Journal policy for the transcript of the editorial process (containing referee reports and your response letter) to be published as an online supplement to each paper.

Also, in case you might NOT want the transparent process file published at all, you will also need to inform us via email immediately. More information is available here:

<https://www.embopress.org/page/journal/14602075/authorguide#transparentprocess>

-----  
Please note that in order to be able to start the production process, our publisher will need and contact you shortly regarding the page charge authorisation and licence to publish forms.

Authors of accepted peer-reviewed original research articles may choose to pay a fee in order for their published article to be made freely accessible to all online immediately upon publication. The EMBO Open fee is fixed at €5,500 EUR (+ VAT where applicable).

We offer two licenses for Open Access papers, CC-BY and CC-BY-NC-ND.

For more information on these licenses, please visit:

[http://creativecommons.org/licenses/by-nc-nd/3.0/deed.en\\_US](http://creativecommons.org/licenses/by-nc-nd/3.0/deed.en_US)

Should you be planning a Press Release on your article, please get in contact with [embojournal@wiley.com](mailto:embojournal@wiley.com) as early as possible, in order to coordinate publication and release dates.

On a different note, I would like to alert you that EMBO Press is currently developing a new format for a video-synopsis of work published with us, which essentially is a short, author-generated film explaining the core findings in hand drawings, and, as we believe, can be very useful to increase visibility of the work. This has proven to offer a nice opportunity for exposure i.p. for the first author(s) of the study. Please see the following link for representative examples and their integration into the article web page:

[https://www.embopress.org/video\\_synopses](https://www.embopress.org/video_synopses)

<https://www.embopress.org/doi/full/10.15252/emj.2019103932>

Please let me know, should you be interested to engage in commissioning a similar video synopsis for your work. According operation instructions are available and intuitive.

If you have any questions, please do not hesitate to call or email the Editorial Office.

Thank you for this contribution to The EMBO Journal and congratulations on a successful publication!

Please consider us again in the future for your most exciting work.

with

Kind regards,

Daniel

Daniel Klimmeck, PhD  
Senior Editor  
The EMBO Journal

EMBO  
Postfach 1022-40  
Meyerhofstrasse 1  
D-69117 Heidelberg  
contact@embojournal.org  
Submit at: <http://emboj.msubmit.net>

## EMBO Press Author Checklist

|                                                          |
|----------------------------------------------------------|
| Corresponding Author Name: Hiroshi Ohta, Mitinori Saitou |
| Journal Submitted to: The EMBO Journal                   |
| Manuscript Number: EMBOJ-2022-110815                     |

### USEFUL LINKS FOR COMPLETING THIS FORM

- [The EMBO Journal - Author Guidelines](#)
- [EMBO Reports - Author Guidelines](#)
- [Molecular Systems Biology - Author Guidelines](#)
- [EMBO Molecular Medicine - Author Guidelines](#)

### Reporting Checklist for Life Science Articles (updated January 2022)

This checklist is adapted from Materials Design Analysis Reporting (MDAR) Checklist for Authors. MDAR establishes a minimum set of requirements in transparent reporting in the life sciences (see Statement of Task: [10.31222/osf.io/9sm4x](https://doi.org/10.31222/osf.io/9sm4x)). Please follow the journal's guidelines in preparing your manuscript.

**Please note that a copy of this checklist will be published alongside your article.**

### Abridged guidelines for figures

#### 1. Data

The data shown in figures should satisfy the following conditions:

- the data were obtained and processed according to the field's best practice and are presented to reflect the results of the experiments in an accurate and unbiased manner.
- ideally, figure panels should include only measurements that are directly comparable to each other and obtained with the same assay.
- plots include clearly labeled error bars for independent experiments and sample sizes. Unless justified, error bars should not be shown for technical replicates.
- if  $n < 5$ , the individual data points from each experiment should be plotted. Any statistical test employed should be justified.
- Source Data should be included to report the data underlying figures according to the guidelines set out in the authorship guidelines on Data Presentation.

#### 2. Captions

Each figure caption should contain the following information, for each panel where they are relevant:

- a specification of the experimental system investigated (eg cell line, species name).
- the assay(s) and method(s) used to carry out the reported observations and measurements.
- an explicit mention of the biological and chemical entity(ies) that are being measured.
- an explicit mention of the biological and chemical entity(ies) that are altered/varied/perturbed in a controlled manner.
- the exact sample size (n) for each experimental group/condition, given as a number, not a range;
- a description of the sample collection allowing the reader to understand whether the samples represent technical or biological replicates (including how many animals, litters, cultures, etc.).
- a statement of how many times the experiment shown was independently replicated in the laboratory.
- definitions of statistical methods and measures:
  - common tests, such as t-test (please specify whether paired vs. unpaired), simple  $\chi^2$  tests, Wilcoxon and Mann-Whitney tests, can be unambiguously identified by name only, but more complex techniques should be described in the methods section;
  - are tests one-sided or two-sided?
  - are there adjustments for multiple comparisons?
  - exact statistical test results, e.g., P values = x but not P values < x;
  - definition of 'center values' as median or average;
  - definition of error bars as s.d. or s.e.m.

**Please complete ALL of the questions below.**  
Select "Not Applicable" only when the requested information is not relevant for your study.

### Materials

| Newly Created Materials                                                                                                                                                                                       | Information included in the manuscript? | In which section is the information available?<br>(Reagents and Tools Table, Materials and Methods, Figures, Data Availability Section) |
|---------------------------------------------------------------------------------------------------------------------------------------------------------------------------------------------------------------|-----------------------------------------|-----------------------------------------------------------------------------------------------------------------------------------------|
| New materials and reagents need to be available; do any restrictions apply?                                                                                                                                   | Not Applicable                          |                                                                                                                                         |
| Antibodies                                                                                                                                                                                                    | Information included in the manuscript? | In which section is the information available?<br>(Reagents and Tools Table, Materials and Methods, Figures, Data Availability Section) |
| For <b>antibodies</b> provide the following information:<br>- Commercial antibodies: RRID (if possible) or supplier name, catalogue number and/or clone number<br>- Non-commercial: RRID or citation          | Yes                                     | Material and Methods                                                                                                                    |
| DNA and RNA sequences                                                                                                                                                                                         | Information included in the manuscript? | In which section is the information available?<br>(Reagents and Tools Table, Materials and Methods, Figures, Data Availability Section) |
| Short novel DNA or RNA including primers, probes: provide the sequences.                                                                                                                                      | Yes                                     | Table                                                                                                                                   |
| Cell materials                                                                                                                                                                                                | Information included in the manuscript? | In which section is the information available?<br>(Reagents and Tools Table, Materials and Methods, Figures, Data Availability Section) |
| <b>Cell lines:</b> Provide species information, strain. Provide accession number in repository OR supplier name, catalog number, clone number, and/OR RRID.                                                   | Not Applicable                          |                                                                                                                                         |
| <b>Primary cultures:</b> Provide species, strain, sex of origin, genetic modification status.                                                                                                                 | Yes                                     | Material and Methods                                                                                                                    |
| Report if the cell lines were recently <b>authenticated</b> (e.g., by STR profiling) and tested for mycoplasma contamination.                                                                                 | Not Applicable                          |                                                                                                                                         |
| Experimental animals                                                                                                                                                                                          | Information included in the manuscript? | In which section is the information available?<br>(Reagents and Tools Table, Materials and Methods, Figures, Data Availability Section) |
| <b>Laboratory animals or Model organisms:</b> Provide species, strain, sex, age, genetic modification status. Provide accession number in repository OR supplier name, catalog number, clone number, OR RRID. | Yes                                     | Material and Methods                                                                                                                    |
| <b>Animal observed in or captured from the field:</b> Provide species, sex, and age where possible.                                                                                                           | Not Applicable                          |                                                                                                                                         |
| Please detail housing and husbandry conditions.                                                                                                                                                               | Yes                                     | Material and Methods                                                                                                                    |
| Plants and microbes                                                                                                                                                                                           | Information included in the manuscript? | In which section is the information available?<br>(Reagents and Tools Table, Materials and Methods, Figures, Data Availability Section) |
| <b>Plants:</b> provide species and strain, ecotype and cultivar where relevant, unique accession number if available, and source (including location for collected wild specimens).                           | Not Applicable                          |                                                                                                                                         |
| <b>Microbes:</b> provide species and strain, unique accession number if available, and source.                                                                                                                | Not Applicable                          |                                                                                                                                         |
| Human research participants                                                                                                                                                                                   | Information included in the manuscript? | In which section is the information available?<br>(Reagents and Tools Table, Materials and Methods, Figures, Data Availability Section) |
| If collected and within the bounds of privacy constraints report on age, sex and gender or ethnicity for all study participants.                                                                              | Not Applicable                          |                                                                                                                                         |
| Core facilities                                                                                                                                                                                               | Information included in the manuscript? | In which section is the information available?<br>(Reagents and Tools Table, Materials and Methods, Figures, Data Availability Section) |
| If your work benefited from core facilities, was their service mentioned in the acknowledgments section?                                                                                                      | Yes                                     | Acknowledgements                                                                                                                        |

### Design

| <b>Study protocol</b>                                                                                                                                                                                                                                                                                                                      | <b>Information included in the manuscript?</b> | <b>In which section is the information available?</b><br>(Reagents and Tools Table, Materials and Methods, Figures, Data Availability Section) |
|--------------------------------------------------------------------------------------------------------------------------------------------------------------------------------------------------------------------------------------------------------------------------------------------------------------------------------------------|------------------------------------------------|------------------------------------------------------------------------------------------------------------------------------------------------|
| If study protocol has been <b>pre-registered</b> , provide DOI in the manuscript. For clinical trials, provide the trial registration number OR cite DOI.                                                                                                                                                                                  | Not Applicable                                 |                                                                                                                                                |
| Report the <b>clinical trial registration number</b> (at ClinicalTrials.gov or equivalent), where applicable.                                                                                                                                                                                                                              | Not Applicable                                 |                                                                                                                                                |
| <b>Laboratory protocol</b>                                                                                                                                                                                                                                                                                                                 | <b>Information included in the manuscript?</b> | <b>In which section is the information available?</b><br>(Reagents and Tools Table, Materials and Methods, Figures, Data Availability Section) |
| Provide DOI OR other citation details if <b>external detailed step-by-step protocols</b> are available.                                                                                                                                                                                                                                    | Yes                                            | Material and Methods                                                                                                                           |
| <b>Experimental study design and statistics</b>                                                                                                                                                                                                                                                                                            | <b>Information included in the manuscript?</b> | <b>In which section is the information available?</b><br>(Reagents and Tools Table, Materials and Methods, Figures, Data Availability Section) |
| Include a statement about <b>sample size</b> estimate even if no statistical methods were used.                                                                                                                                                                                                                                            | Not Applicable                                 |                                                                                                                                                |
| Were any steps taken to minimize the effects of subjective bias when allocating animals/samples to treatment (e.g. <b>randomization procedure</b> )? If yes, have they been described?                                                                                                                                                     | Not Applicable                                 |                                                                                                                                                |
| Include a statement about <b>blinding</b> even if no blinding was done.                                                                                                                                                                                                                                                                    | Not Applicable                                 |                                                                                                                                                |
| Describe <b>inclusion/exclusion criteria</b> if samples or animals were excluded from the analysis. Were the criteria pre-established?                                                                                                                                                                                                     | Not Applicable                                 |                                                                                                                                                |
| If sample or data points were omitted from analysis, report if this was due to attrition or intentional exclusion and provide justification.                                                                                                                                                                                               |                                                |                                                                                                                                                |
| For every figure, are <b>statistical tests</b> justified as appropriate? Do the data meet the assumptions of the tests (e.g., normal distribution)? Describe any methods used to assess it. Is there an estimate of variation within each group of data? Is the variance similar between the groups that are being statistically compared? | Yes                                            | Figures, Material and Methods                                                                                                                  |
| <b>Sample definition and in-laboratory replication</b>                                                                                                                                                                                                                                                                                     | <b>Information included in the manuscript?</b> | <b>In which section is the information available?</b><br>(Reagents and Tools Table, Materials and Methods, Figures, Data Availability Section) |
| In the figure legends: state number of times the experiment was <b>replicated</b> in laboratory.                                                                                                                                                                                                                                           | Yes                                            | Figures                                                                                                                                        |
| In the figure legends: define whether data describe <b>technical or biological replicates</b> .                                                                                                                                                                                                                                            | Yes                                            | Figures                                                                                                                                        |

#### Ethics

| <b>Ethics</b>                                                                                                                                                                                                                                                                                            | <b>Information included in the manuscript?</b> | <b>In which section is the information available?</b><br>(Reagents and Tools Table, Materials and Methods, Figures, Data Availability Section) |
|----------------------------------------------------------------------------------------------------------------------------------------------------------------------------------------------------------------------------------------------------------------------------------------------------------|------------------------------------------------|------------------------------------------------------------------------------------------------------------------------------------------------|
| Studies involving <b>human participants</b> : State details of <b>authority granting ethics approval</b> (IRB or equivalent committee(s), provide reference number for approval.                                                                                                                         | Yes                                            | Material and Methods                                                                                                                           |
| Studies involving <b>human participants</b> : Include a statement confirming that <b>informed consent</b> was obtained from all subjects and that the experiments conformed to the principles set out in the WMA Declaration of Helsinki and the Department of Health and Human Services Belmont Report. | Yes                                            | Material and Methods                                                                                                                           |
| Studies involving <b>human participants</b> : For publication of <b>patient photos</b> , include a statement confirming that consent to publish was obtained.                                                                                                                                            | Not Applicable                                 |                                                                                                                                                |
| Studies involving experimental <b>animals</b> : State details of <b>authority granting ethics approval</b> (IRB or equivalent committee(s), provide reference number for approval. Include a statement of compliance with ethical regulations.                                                           | Yes                                            | Material and Methods                                                                                                                           |
| Studies involving <b>specimen and field samples</b> : State if relevant <b>permits</b> obtained, provide details of authority approving study; if none were required, explain why.                                                                                                                       | Not Applicable                                 |                                                                                                                                                |
| <b>Dual Use Research of Concern (DURC)</b>                                                                                                                                                                                                                                                               | <b>Information included in the manuscript?</b> | <b>In which section is the information available?</b><br>(Reagents and Tools Table, Materials and Methods, Figures, Data Availability Section) |
| Could your study fall under dual use research restrictions? Please check biosecurity documents and list of <b>select agents and toxins</b> (CDC): <a href="https://www.selectagents.gov/sat/list.htm">https://www.selectagents.gov/sat/list.htm</a> .                                                    | Not Applicable                                 |                                                                                                                                                |
| If you used a select agent, is the security level of the lab appropriate and reported in the manuscript?                                                                                                                                                                                                 | Not Applicable                                 |                                                                                                                                                |
| If a study is subject to dual use research of concern regulations, is the name of the <b>authority granting approval and reference number</b> for the regulatory approval provided in the manuscript?                                                                                                    | Not Applicable                                 |                                                                                                                                                |

#### Reporting

The MDAR framework recommends adoption of discipline-specific guidelines, established and endorsed through community initiatives. Journals have their own policy about requiring specific guidelines and recommendations to complement MDAR.

| <b>Adherence to community standards</b>                                                                                                                                                                                                                                                                                              | <b>Information included in the manuscript?</b> | <b>In which section is the information available?</b><br>(Reagents and Tools Table, Materials and Methods, Figures, Data Availability Section) |
|--------------------------------------------------------------------------------------------------------------------------------------------------------------------------------------------------------------------------------------------------------------------------------------------------------------------------------------|------------------------------------------------|------------------------------------------------------------------------------------------------------------------------------------------------|
| State if relevant guidelines or checklists (e.g., ICMJE, MIBBI, ARRIVE, PRISMA) have been followed or provided.                                                                                                                                                                                                                      | Not Applicable                                 |                                                                                                                                                |
| For <b>tumor marker prognostic studies</b> , we recommend that you follow the <b>REMARK</b> reporting guidelines (see link list at top right). See author guidelines, under 'Reporting Guidelines'. Please confirm you have followed these guidelines.                                                                               | Not Applicable                                 |                                                                                                                                                |
| For <b>phase II and III randomized controlled trials</b> , please refer to the <b>CONSORT</b> flow diagram (see link list at top right) and submit the <b>CONSORT</b> checklist (see link list at top right) with your submission. See author guidelines, under 'Reporting Guidelines'. Please confirm you have submitted this list. | Not Applicable                                 |                                                                                                                                                |

#### Data Availability

| <b>Data availability</b>                                                                                                                                                                          | <b>Information included in the manuscript?</b> | <b>In which section is the information available?</b><br>(Reagents and Tools Table, Materials and Methods, Figures, Data Availability Section) |
|---------------------------------------------------------------------------------------------------------------------------------------------------------------------------------------------------|------------------------------------------------|------------------------------------------------------------------------------------------------------------------------------------------------|
| Have <b>primary datasets</b> been deposited according to the journal's guidelines (see 'Data Deposition' section) and the respective accession numbers provided in the Data Availability Section? | Yes                                            | Data Availability                                                                                                                              |
| Were <b>human clinical and genomic datasets</b> deposited in a public access-controlled repository in accordance to ethical obligations to the patients and to the applicable consent agreement?  | Not Applicable                                 |                                                                                                                                                |
| Are <b>computational models</b> that are central and integral to a study available without restrictions in a machine-readable form? Were the relevant accession numbers or links provided?        | Not Applicable                                 |                                                                                                                                                |
| If publicly available data were reused, provide the respective <b>data citations</b> in the <b>reference list</b> .                                                                               | Yes                                            | Material and Methods, Reference list                                                                                                           |
